# Supplementary material
Source: ML conference proceedings conference paper supplement (https://openreview.net/forum?id=Dm4qrBuFKH)
Supplement: supplementary_material [file attachment]

# TRAINING BINARY NEURAL NETWORKS IN A BINARY WEIGHT SPACE

**Anonymous authors**

Paper under double-blind review

## ABSTRACT

Binary neural networks (BNNs), which have binary weights and activations, hold significant potential for enabling neural computations on low-end edge devices with limited computational power and memory resources. Currently, most existing BNN training approaches optimize and binarize real-valued weights, leading to substantial memory usage during training. Though training BNNs without real-valued weights to save memory is intriguing, it has been deemed challenging with gradient-based optimization. To address this challenge, we define an update probability for binary weights, determined by the current binary weights and real-valued gradients. The binary weights generated by our method match those obtained by SGD in the real-space training of BNNs in the expectation. As a result, the training of binary weights becomes stable even without real weights. Our method yields test results on Tiny-ImageNet comparable to baselines that utilize real weights during training, yet reduces memory usage by up to a factor of 33.

## 1 INTRODUCTION

Neural networks (NNs) have achieved significant breakthroughs in various research fields such as image recognition and natural language processing (Bahdanau et al., 2015; He et al., 2016; Dosovitskiy et al., 2021). The demand for NNs, therefore, extends to resource-constrained edge devices including industrial quality control terminals, domestic gadgets, and wearable devices. Consequently, there has been an increasing number of studies in reducing NN memory usage during *inference*. Knowledge distillation (Hinton et al., 2015; Yim et al., 2017), neural architecture search (Zoph & Le, 2017; Mellor et al., 2021), network pruning (Li et al., 2017; Meng et al., 2020), and tensor decomposition (Li et al., 2009; Anandkumar et al., 2014) aim to construct compact and high-performing models. Network quantization methods replace high-precision trained weights with low-precision ones in inference, such as 4-bit, 2-bit, or even 1-bit (Bhalgat et al., 2020; Esser et al., 2020; Gupta et al., 2015; Liu et al., 2021), where the 1-bit case is referred to as binary neural networks (BNNs).

BNNs (Hubara et al., 2016), having binary weights and activations, offer significant memory savings compared to real NNs. The multiply-add operations in BNNs can be implemented using hardware-friendly XNOR and bit-count operations, eliminating the need for computationally expensive floating-point operations or fixed-point overflow handling. Rastegari et al. (2016) demonstrated a 58-times speed-up in inference with BNNs, making real-time inference feasible on edge devices.

Unlike inference, training BNNs requires nontrivial techniques. Specifically, when certain layers employ a piecewise constant activation function like the sign function, all the layer-wise gradients for the loss function up to that layer vanish. As a result, direct application of gradient descent is infeasible. Among methods tackling this issue (Liu et al., 2018; Gong et al., 2019), the straight-through estimator (STE) (Bengio et al., 2013) replaces the first derivative of the activation function with a piecewise constant function to prevent gradient van-

Table 1: Weight precision [bit]. FP indicates the floating-point format, *i.e.*, typically 32-bit. Our goal is to train BNNs without retaining real-valued weights, which is different from the traditional BNNs training setup.

|                                 | Training | Inference |
|---------------------------------|----------|-----------|
| LSQ (Wang et al., 2021)         | FP       | $\geq 2$  |
| Naive STE (Hubara et al., 2016) | FP       | 1         |
| ScaleGrad (Sun et al., 2020)    | $\geq 4$ | $\geq 4$  |
| MIP (Kurtz & Bah, 2021)         | 1        | 1         |
| Ours (binary-space training)    | 1        | 1         |

ishing, and recent frequency domain approximation (Xu et al., 2021) approximates the sign function in the Fourier domain to obtain a pseudo-gradient that preserves the genuine gradient direction.

Although these methods have improved BNNs’ performance, they require maintaining real-valued weights alongside the binary weights during *training*, which consumes a significant amount of memory. Reducing memory consumption during training is crucial for enabling on-edge deep learning, which is in high demand; for example, an edge AI system for crop quality control on farms without WiFi access may need to be locally updated, or a home monitoring system may require personalization without sending private information outside. Several studies have focused on reducing memory use during training as summarized in Table 1. Wang et al. (2021) proposed a gradient-quantization method to train BNNs, demonstrating a 3.7 times reduction in memory compared to conventional BNNs while retaining real-valued weights throughout training. Another study attempted to train binary weights directly by using fully model-based discrete optimization methods (Kurtz & Bah, 2021), including mixed-integer programming (MIP). However, these methods have been evaluated only on datasets smaller than MNIST due to significant training-time constraints. Sun et al. (2020) introduced a method to train 4-bit weights by quantizing gradients on a log scale and applying stochastic gradient descent (SGD). However, it is commonly believed that the use of SGD requires maintaining a certain degree of precision in the weights as accumulators (Hubara et al., 2016), and it is challenging to extend SGD directly to training 1-bit weights since encoding gradient direction alone consumes 1-bit. While binary (1-bit) weights are computationally efficient, to the best of our knowledge, none of the previous methods have successfully trained BNNs on practical datasets such as Tiny-ImageNet without the use of real-valued weights.

To mitigate memory consumption during training, we introduce a novel BNN training algorithm that eliminates the need for real-valued weights. Our method calculates an appropriate probability for binary weights to flip their sign so that the loss is expected to decrease. To derive this probability, we model the distribution of real-valued weights and design a stochastic masking method that reflects the magnitude of the real-valued gradients to emulate weight updates in real-space training.

Our contribution is three-fold: 1) We have introduced a memory-efficient BNN training method that does not require the retention of real weights. We define an update probability for binary weights as a function of the current binary weights and approximations of real gradients. The binary weights produced by our update rule match in expectation obtained by the conventional BNN training method that uses real weights. 2) We have successfully trained BNNs using the proposed algorithm on relatively large datasets, such as Tiny-ImageNet, for the first time. The performance of our method on Tiny-ImageNet is comparable to that of an existing method retaining real weights. 3) We have analytically evaluated the memory footprints required by BNN training methods and demonstrated that our method can reduce memory usage by a factor of 33 compared to the conventional BNN training method retaining real weights in scenarios with infinite hidden units.

## 2 RELATED WORK

A binary neural network (BNN) (Courbariaux et al., 2015; Hubara et al., 2016) is a variant of NNs that utilizes binary weights and propagates binary activation values to achieve efficient inference. Numerous efforts have been dedicated to developing architectures (Rastegari et al., 2016; Darabi et al., 2018; Bulat & Tzimiropoulos, 2019; Martinez et al., 2020; Qin et al., 2020; 2023) and gradient approximation methods (Gong et al., 2019; Cai et al., 2017) for BNNs. Through these studies, a learning paradigm that optimizes *real-valued* weights and binarizes them using a sign function during propagation has emerged as one of the most successful approaches for obtaining trained binary weights. During training, BNNs propagate binary activation values at each layer  $l = 1, \dots, L$  as

$$\mathbf{h}_l = \text{sgn}(\mathbf{a}_l), \quad \mathbf{a}_l = \text{sgn}(\boldsymbol{\omega}_l) \mathbf{h}_{l-1}, \quad \text{where } \text{sgn}(x) = \begin{cases} 1 & (x \geq 0) \\ -1 & (x < 0) \end{cases}, \quad (1)$$

where  $\mathbf{h}_l$  is an output,  $\boldsymbol{\omega}_l \in \mathbb{R}^{D_l \times D_{l-1}}$  is a real-valued weight matrix,  $D_l$  is a dimension of  $l$ -th layer and  $L$  is the number of layers. To compute the pseudo-gradient of the loss function, the STE (Bengio et al., 2013) is widely adopted to address the gradient vanishing issues caused by the sign activation function; it approximates the derivative of the sign function by that of a *hard tanh* function (Hubara et al., 2016) during backward propagation. Given a loss function  $\mathcal{L}$ , it computes a pseudo-gradient of

**Algorithm 1:** Training BNN in binary space**Requires:** *Mini-batch*  $(X, Y)$ , *MaskGenerator*

Forward process:

 $h_0 = X$ **for**  $l = 1$  **to**  $L$  **do**

$$\begin{aligned} & \mathbf{a}_l = \text{BatchNorm}_{0,1}(\mathbf{w}_l \mathbf{h}_{l-1}) \\ & \mathbf{h}_l = \text{sgn}(\mathbf{a}_l) \end{aligned}$$

Backward process:

 $\mathcal{L} = \text{SoftmaxCE}(Y, \mathbf{a}_L)$ **for**  $l = L$  **to**  $1$  **do**

$$\begin{aligned} & \mathbf{g}_l \leftarrow \nabla_{\mathbf{w}_l} \mathcal{L}, \quad \mathbf{w}_l^* \leftarrow \llbracket -\mathbf{g}_l \geq 0 \rrbracket \\ & \mathbf{m}_l \leftarrow \text{MaskGenerator}(\mathbf{w}_l, \mathbf{g}_l) \\ & \mathbf{w}_l \leftarrow \overline{\mathbf{m}}_l \cdot \mathbf{w}_l + \mathbf{m}_l \cdot \mathbf{w}_l^* \end{aligned}$$
**Algorithm 2:** Training BNN in real space**Requires:** *Mini-batch*  $(X, Y)$ , *Learning rate*  $\eta$ 

Forward process:

 $h_0 = X$ **for**  $l = 1$  **to**  $L$  **do**

$$\begin{aligned} & \mathbf{a}_l = \text{BatchNorm}_{\mu_l, \sigma_l}(\text{sgn}(\boldsymbol{\omega}_l) \mathbf{h}_{l-1}) \\ & \mathbf{h}_l = \text{sgn}(\mathbf{a}_l) \end{aligned}$$

Backward process:

 $\mathcal{L} = \text{SoftmaxCE}(Y, \mathbf{a}_L)$ **for**  $l = L$  **to**  $1$  **do**

$$\begin{aligned} & \mathbf{g}_l \leftarrow \nabla_{\text{sgn}(\boldsymbol{\omega}_l)} \mathcal{L}, \quad \boldsymbol{\omega}_l^* \leftarrow \boldsymbol{\omega}_l - \mathbf{g}_l \\ & \boldsymbol{\omega}_l \leftarrow (1 - \eta) \boldsymbol{\omega}_l + \eta \boldsymbol{\omega}_l^* \end{aligned}$$
 $\mathcal{L}$  with respect to  $\mathbf{a}_l$  and  $\boldsymbol{\omega}_l$  by

$$\frac{\partial \mathcal{L}}{\partial \mathbf{a}_l} \approx \frac{\partial \mathcal{L}}{\partial \mathbf{h}_l} \circ \mathbf{1}_{|\mathbf{a}_l| \leq 1}, \quad \frac{\partial \mathcal{L}}{\partial \boldsymbol{\omega}_l} \approx \frac{\partial \mathcal{L}}{\partial \text{sgn}(\boldsymbol{\omega}_l)}. \quad (2)$$

These gradient approximations enable the training of real-valued weights using stochastic gradient descent (SGD) methods. While STE has been successful in training BNNs, it typically requires real-valued weights, which implies substantial memory usage during *training*.

### 3 TRAINING BNNs IN A BINARY WEIGHT SPACE

Since binary weights have extremely low precision, direct optimization in the binary weight space based on gradients is not straightforward. In this study, we attempt to address this challenge by extending SGD to the binary space and deriving a stochastic update rule.

#### 3.1 ALGORITHM

**Overview and notation.** Let  $\mathbf{w} \in B^N$  be a binary vector of flattened learnable parameters of a certain layer of a BNN. While many previous studies use  $B = \{1, -1\}$ , we use  $B = \{0, 1\}$  to make the discussion concise with Boolean operations: OR  $a + b$ , AND  $a \cdot b$ , and NOT  $\bar{a}$  for  $a, b \in B$ . With time index  $t = 0, 1, \dots$ , we denote by  $\mathbf{w}_t$  the binary weights at time  $t$  and assume that  $\mathbf{w}_0$  is randomly initialized. The overview of our binary-space training is shown in Algorithm 1. Inspired by SGD, our algorithm iteratively updates the binary weights. The main flow of the algorithm at time  $t$  takes the following four steps: (1) Given a loss function  $\mathcal{L}$ , the real gradient  $\mathbf{g}_t = \nabla_{\mathbf{w}_t} \mathcal{L} \in \mathbb{R}^N$  is computed. (2) We compute  $\mathbf{w}_t^* = \llbracket -\mathbf{g}_t \geq 0 \rrbracket \in B^N$ , which we call target weight, where  $\llbracket x \rrbracket$  takes 1 if  $x$  is True and 0 otherwise. (3) A *hypermask*  $\mathbf{m}_t \in B^N$  is sampled from a conditional probability distribution over  $B^N$  given  $\mathbf{g}_t$  and  $\mathbf{w}_{t-1}$ . (4) The binary weights are updated as follows:

$$\mathbf{w}_t = \overline{\mathbf{m}}_t \cdot \mathbf{w}_{t-1} + \mathbf{m}_t \cdot \mathbf{w}_t^*, \quad (3)$$

where Boolean operations are applied element-wise.

**Analogy to SGD in real space.** The update rule in Eq (3) is motivated by SGD in Algorithm 2. With SGD, the following update rule is applied to train a real-valued weight  $\boldsymbol{\omega}_t \in \mathbb{R}^N$

$$\boldsymbol{\omega}_t = (1 - \eta) \boldsymbol{\omega}_{t-1} + \eta \boldsymbol{\omega}_t^*, \quad (4)$$

where  $\eta$  is a hyperparameter (learning rate) and  $\boldsymbol{\omega}_t^* = \boldsymbol{\omega}_{t-1} - \mathbf{g}_t$  is what we call target weight. When  $\eta \in [0, 1]$ , this update rule is equivalent to replacing the point  $\boldsymbol{\omega}_{t-1}$  by a certain point  $\boldsymbol{\omega}_t$  that satisfies

$$\boldsymbol{\omega}_t \in \underset{\mathbf{p} \in \mathbb{R}^N}{\text{argmin}} (\|\boldsymbol{\omega}_{t-1} - \mathbf{p}\|_2 + \|\boldsymbol{\omega}_t^* - \mathbf{p}\|_2) \quad (5)$$

because  $\boldsymbol{\omega}_t$  is an interpolation of  $\boldsymbol{\omega}_{t-1}$  and  $\boldsymbol{\omega}_t^*$  as shown in Figure 1a. Analogously, binary weight update in the binary metric space  $(B^N, d)$  can be chosen from a set of candidate points given by

$$\mathbf{w}_t \in C_t := \underset{\mathbf{p} \in B^N}{\text{argmin}} (d(\mathbf{w}_{t-1}, \mathbf{p}) + d(\mathbf{w}_t^*, \mathbf{p})), \quad (6)$$

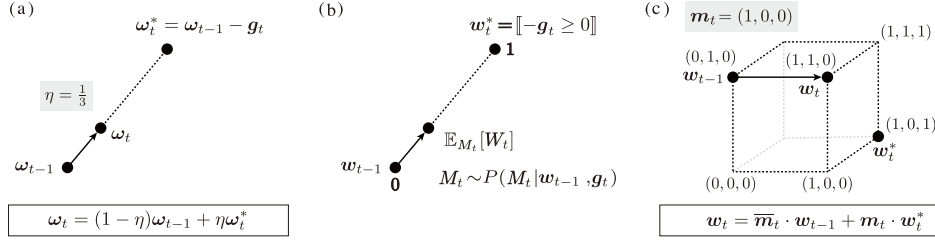

Figure 1: Update rules. (a) In SGD, the magnitude of the update is adjusted by the learning rate and gradient. (b) In binary-space training, a hypermask is used to update binary weights, which controls the expected value of the magnitude of the update. (c) Example of the binary-space update in  $B^3$ .

where  $d(\cdot, \cdot)$  is a distance function in  $B^N$ . In the case of Hamming distance  $d(a, b) = |\{i = 1, \dots, N : a_i \neq b_i\}|$ , the candidate set becomes

$$C_t = \{w_t : w_t = \bar{m}_t \cdot w_{t-1} + m_t \cdot w_t^*, m_t \in B^N\}. \quad (7)$$

By choosing a particular binary vector  $m_t$ , which we call hypermask,  $w_t$  is uniquely defined as in Eq. (3). In this way, the hypermask in the binary update rule plays an analogous role to the learning rate in the real update rule. As the hypermask governs the learning dynamics in the binary weight space, the design of the high-dimensional hypermask is crucial.

**Intuitive picture.** Figure 1 shows the update rule of Eq. (3) and its analogy to SGD. Suppose we have a three-dimensional weight  $w_{t-1} = (0, 1, 0)$  and target weight  $w_t^* = (1, 0, 1)$  at time  $t$ . Then the candidate set  $C_t$  is the set of corner points of a hypercube between  $w_{t-1}$  and  $w_t^*$ . By specifying a hypermask  $m_t \in B^3$ , one of the corner points is chosen as  $w_t$ .

### 3.2 DESIGN OF HYPERMASKS

In real-space training, a fixed learning rate across multiple mini-batches is still effective as real gradients reflect their magnitudes. However, in binary-space training, the magnitude of update  $w_t^* - w$  always takes 0 or 1 and the magnitude of the real gradient cannot be reflected when a *fixed* hypermask is used. Therefore, we explore the stochastic construction of hypermasks.

**Notation and setting** We consider two update rules of binary weights. Given observations of a real-valued weight  $\omega_{t-1} \in \mathbb{R}$  and gradient  $g_t \in \mathbb{R}$ , the first rule, *real-space update*, updates binary weights in a real space in the following two steps: 1) update the real-valued weight as  $\omega_t = \omega_{t-1} - \eta g_t$ , 2) update the binary weight as  $\hat{w}_t = \llbracket \omega_t \geq 0 \rrbracket$ . This is the conventional training rule for BNNs. The second rule, *binary-space update*, updates binary weights in a binary space by using a hypermask  $m_t \in B$  as  $w_t = \bar{m}_t \cdot w_{t-1} + m_t \cdot \llbracket -g_t \geq 0 \rrbracket$  where  $w_{t-1} = \llbracket \omega_{t-1} \geq 0 \rrbracket \in B$ . Figure 2 compares these update rules. Note that notation is simplified to scalar to improve the readability but extension to multiple dimensions is straightforward. The capital letters of the above variables are used to indicate the random variables. For example,  $\Omega_t$  and  $W_t$  are random variables of  $\omega_t$  and  $w_t$ , respectively. When there is no confusion, the probability  $P(W_t = w_t)$  is simply denoted by  $P(w_t)$ .

In the following, we introduce two *good* properties to emulate the real-space update by the binary-space update. The first property guarantees that the expected value of the binary-space update will match that of the real-space update, and the second property maximizes the probability that the binary-space update matches the real-space update.

**Definition 1 (Expectation matching property).** We say that the mask distribution  $P(M_t|w_{t-1}, g_t)$  satisfies the expectation matching property (EMP) if the following condition is satisfied:

$$\mathbb{E}_{W_t \sim P(W_t|w_{t-1}, g_t)}[W_t] = \mathbb{E}_{\hat{W}_t \sim P(\hat{W}_t|w_{t-1}, g_t)}[\hat{W}_t]. \quad (8)$$

Intuitively, the magnitude of the update is adjusted in expectation as shown in Figures 1b.

**Definition 2 (Matching maximization property).** We say that the mask distribution  $P(M_t|w_{t-1}, g_t)$  satisfies the matching maximization property (MMP) if it maximizes the matching probability MP between  $W_t$  and  $\hat{W}_t$  given by

$$\text{MP} = \sum_{b \in B} P(W_t = b|w_{t-1}, g_t) P(\hat{W}_t = b|w_{t-1}, g_t). \quad (9)$$

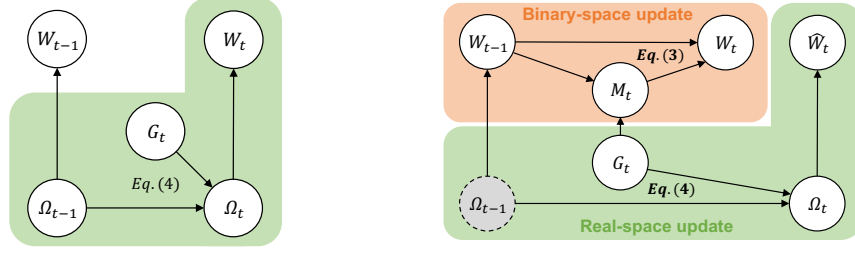

Figure 2: Graphical model for the real- (left) and binary-space training (right, ours). (Left) The real weight  $\Omega_t$  is updated after the observation of  $\Omega_{t-1}$  and  $G_t$ . (Right) The binary-space update defines the mask distribution to simulate the real-space update which assumes the distribution of  $\Omega_{t-1}$ .

Next, we give mask distributions that satisfy the EMP and MMP. To derive them, we first model the probability that the sign of the binary weight flips in the real-space update. In the binary-space training, the real-valued weights do not exist; thus, we assume that  $\Omega_{t-1}$  obeys a certain distribution.

**Theorem 1 (Sign-flipping probability)<sup>1</sup>.** Suppose that  $G_t \perp\!\!\!\perp \Omega_{t-1}$  (i.e.,  $G_t$  and  $\Omega_{t-1}$  are independent) and the distribution of  $\omega_{t-1}$  is given by  $P(\Omega_{t-1} = x) = \varphi_{t-1}(x)$ , where  $\varphi_{t-1} : \mathbb{R} \rightarrow \mathbb{R}_{\geq 0}$  is a probability density function which is symmetric w.r.t. the origin. The sign-flipping probability  $P(\hat{W}_t \neq w_{t-1} | w_{t-1}, g_t)$  in the real-space update using  $\eta \in [0, 1]$  is given by

$$P(\hat{W}_t \neq w_{t-1} | w_{t-1}, g_t) = 2 \int_{I_t} \varphi_{t-1}(x) dx, \quad I_t = \begin{cases} [0, \max(\eta g_t, 0)] & (w_{t-1} = 1) \\ [\min(\eta g_t, 0), 0] & (w_{t-1} = 0) \end{cases}. \quad (10)$$

Using this probability, the mask distributions satisfying the EMP/MMP are derived as follows.

**Theorem 2 (Hypermask with EMP).** The mask distribution satisfies EMP if

$$P(M_t = 1 | w_{t-1}, g_t) = P(\hat{W}_t \neq w_{t-1} | w_{t-1}, g_t). \quad (11)$$

**Theorem 3 (Hypermask with MMP).** The mask distribution satisfies MMP if

$$P(M_t = 1 | w_{t-1}, g_t) = \begin{cases} 1 & (P(\hat{W}_t \neq w_{t-1} | w_{t-1}, g_t) \geq \frac{1}{2}) \\ 0 & (\text{otherwise}) \end{cases}. \quad (12)$$

Theorems 2 and 3 introduce two different hypermasks. With these theorems, we have four steps to obtain a hypermask as follows: (1) Manually design a probability function  $P(\omega_{t-1}) = \varphi_{t-1}(\omega_{t-1})$ . (2) Compute the sign-flipping probability  $P(\hat{W}_t \neq w_{t-1} | w_{t-1}, g_t)$  according to Eq. (10). (3) Compute the mask distribution according to Eq. (11) or (12). (4) Sample a hypermask  $m_t$  from the distribution  $P(M_t | w_{t-1}, g_t)$ . The examples of modelings of  $\varphi_{t-1}$  are provided and discussed in 3.3.

### 3.3 IMPLEMENTATION OF HYPERMASKS

In this subsection, we explicitly write down the probability mass functions of the hypermasks at time  $t$  in the case that a manually designed distribution  $P(\Omega_{t-1})$  is a Gaussian distribution  $N(0, \sigma_{t-1}^2)$  where  $\sigma_{t-1}$  is a standard deviation, i.e.,  $\varphi_{t-1}(x) = \frac{1}{\sqrt{2\pi}\sigma_{t-1}} \exp(-\frac{x^2}{2\sigma_{t-1}^2})$ . In the following, the previous binary weight  $w_{t-1}$  and the real-valued gradient  $g_t$  are supposed to be observed. First, the sign-flipping probability is computed as follows.

**Implementation 1 (Sign-flipping probability).** Given  $\omega_{t-1} \sim N(0, \sigma_{t-1}^2)$ , the sign-flipping probability  $P(\hat{W}_t \neq w_{t-1} | w_{t-1}, g_t)$  is calculated by Theorem 1 as

$$P(\hat{W}_t \neq w_{t-1} | w_{t-1}, g_t) = \begin{cases} \text{erf}(\max(\tau_{t-1} g_t, 0)) & (w_{t-1} = 1) \\ -\text{erf}(\min(\tau_{t-1} g_t, 0)) & (w_{t-1} = 0) \end{cases}, \quad (13)$$

where  $\tau_{t-1} = \eta / \sqrt{2} \sigma_{t-1}$  is a temperature used in simulated annealing methods, etc.

Using Eq. (13) and Theorem 2, the EMP mask, the mask satisfying the EMP, is given as follows.

<sup>1</sup>See Appendix A for the proofs.

**Implementation 2 (EMP Mask).** Given  $\omega_{t-1} \sim N(0, \sigma_{t-1}^2)$ , the EMP mask is explicitly defined by

$$P(M_t = 1 | w_{t-1}, g_t) = \begin{cases} \text{erf}(\max(\tau_{t-1} g_t, 0)) & (w_{t-1} = 1) \\ -\text{erf}(\min(\tau_{t-1} g_t, 0)) & (w_{t-1} = 0) \end{cases}. \quad (14)$$

Similarly, MMP mask, the mask maximizing the MP, is given by Implementation 3.

**Implementation 3 (MMP mask).** Given  $\omega_{t-1} \sim N(0, \sigma_{t-1}^2)$ , the MMP mask is explicitly defined by

$$P(M_t = 1 | w_{t-1}, g_t) = \begin{cases} \mathbb{I}[g_t \geq T_{t-1}(\frac{1}{2})] & (w_{t-1} = 1) \\ \mathbb{I}[g_t \leq T_{t-1}(-\frac{1}{2})] & (w_{t-1} = 0) \end{cases}, \text{ where } T_{t-1}(\cdot) = \frac{\text{erf}^{-1}(\cdot)}{\tau_{t-1}}. \quad (15)$$

The MMP mask takes 1 if the gradient going in the direction of flipping the binary weights is larger than the threshold  $T_{t-1}(\pm\frac{1}{2})$ .

Next, we discuss the determination of  $\tau_{t-1}$  and  $\sigma_{t-1}$ . Assume that  $P(G_t)$  is a Gaussian distribution with zero means and all elements of  $\omega_{t-1}$  and  $g_t$  are i.i.d., respectively. In the real-space update, we have  $P(\Omega_t) = N(\Omega_t | 0, \sigma_{t-1}^2 + \eta^2 \hat{\sigma}_t^2)$ , where  $\hat{\sigma}_t^2$  is the unbiased variance of obtained  $g_t$ . Under this assumption,  $\sigma_t$  is updated by giving  $\sigma_0$  as a hyperparameter in the following way:

$$\sigma_t = \left( \sigma_0^2 + \eta^2 \sum_{k=1}^t \hat{\sigma}_k^2 \right)^{\frac{1}{2}} \quad (t > 0). \quad (16)$$

With Eq. (16), the temperature is scheduled for each iteration as Implementation 4.

**Implementation 4 (Auto schedule for temperature).** The temperature  $\tau_t$  is updated by giving  $\sigma_0$  and  $\eta$  as the hyperparameters in the following way:

$$\tau_t = \frac{\eta}{\sqrt{2}\sigma_t} = \frac{1}{\sqrt{2}\sqrt{(\sigma_0/\eta)^2 + \sum_{k=1}^t \hat{\sigma}_k^2}}. \quad (17)$$

Here,  $\eta$  and  $\sigma_0$  can be combined into a single hyperparameter. The temperature  $\tau_t$  monotonically decreases; thus our proposed binary-space training with EMP/MMP mask converges (See Figure 5).

Finally, in addition to the above two hypermasks, we define a straightforward hypermask, the *random mask*. This hypermask uses randomly sampled values for masking.

**Implementation 5 (Random mask).** We define the random mask by

$$P(M_t = 1) = \delta_t, \text{ where } 0 \leq \delta_t \leq 1. \quad (18)$$

This definition describes that  $m_t$  takes 1 with a probability  $\delta_t$  regardless of whether or not the observation of  $w_{t-1}, g_t$ . If  $\delta_t = 1$  for all iterations, the binary-space training with the random mask is equivalent to updating the binary weight  $w$  with the target weight  $w^*$ .  $\delta_t$  can be scheduled by using any learning rate scheduler such as cosine decay (Loshchilov & Hutter, 2017).

The shapes of the mask probability  $P(M_t = 1 | w_{t-1}, g_t)$  for each mask are shown in Figure 3. Note that the distribution  $P(\Omega_{t-1})$  can be set to other distributions. The use of a Gaussian mixture distribution as  $P(\Omega_{t-1})$  could express the separation of real-valued weights observed in the late stages of BNN training in a real-space training (Rozen et al., 2022).

## 4 ANALYSIS OF MEMORY REDUCTION OF BINARY-SPACE TRAINING

In this section, we discuss memory reduction in the binary-space training of BNNs. Table 2 presents the sets of variables required simultaneously for each algorithm which result in the highest memory consumption. The table also provides the analytical values for this peak memory usage. As the table shows, our binary-space training can reduce the memory consumption relative to the number of layers  $L$  by a factor of 33 compared to the real-space training, especially when  $B \ll D_{hid}$ .

To estimate the memory savings in a practical setting, let's consider the example of training an  $L$ -layered fully connected network using the MNIST. Assuming  $D_{hid} = 1024$  and  $B = 64$ , the estimated peak memory use in binary-space training is  $2.06L + 61.7$  [MiB]. In contrast, real-space training demands  $34.1L - 41.4$  [MiB]. For a relatively shallow model ( $L = 5$ ), the binary-space

Table 2: Analytical memory usage.  $D_{hid}$  and  $B$  are the number of hidden units and the batch size.  $\Theta_{train}$  stands for a training space of weights.  $O()$  is a Big O notation for space complexity w.r.t.  $L$ . FP was assumed to be the commonly used `float32`. The data type of  $M_l$  is considered as `float32` because, when sampled, it requires a full-precision matrix to compute the mask probability.

|      | $\Theta_{train}$ | Variables                                                  |                    |                        | Analytical Memory Usage [Byte]     |
|------|------------------|------------------------------------------------------------|--------------------|------------------------|------------------------------------|
|      |                  | <code>float32</code>                                       | <code>int16</code> | <code>binary</code>    |                                    |
| NNs  | $\mathbb{R}$     | $\{\omega_l, a_l, h_l\}_{l=1}^L, \nabla_{h_L} \mathcal{L}$ | -                  | -                      | $(32D_{hid} + 64B)D_{hid}L + O(1)$ |
| BNNs | $\mathbb{R}$     | $\{\omega_l\}_{l=1}^L, \nabla_{h_L} \mathcal{L}$           | $\{a_l\}_{l=1}^L$  | $\{w_l, h_l\}_{l=1}^L$ | $(33D_{hid} + 17B)D_{hid}L + O(1)$ |
|      | $B$              | $\nabla_{w_l} \mathcal{L}, M_l$                            | $\{a_l\}_{l=1}^L$  | $\{w_l, h_l\}_{l=1}^L$ | $(D_{hid} + 17B)D_{hid}L + O(1)$   |

approach consumes  $\approx 55.8\%$  of what the real-space method uses. For a deeper model ( $L = 50$ ), it uses only  $\approx 9.90\%$  of the real-space’s memory, resulting in  $\simeq 10x$  memory saving. Note that even though the theoretical maximum memory reduction by training BNNs in a binary space can reach up to 33x, our proposed method still needs real gradients. Furthermore, the binary hypermask is sampled based on real-valued probabilities, which can be the bottleneck if the number of layers is low. The additional memory savings would be achieved by quantizing the real gradients (Wang et al., 2021).

## 5 EXPERIMENTS

In this section, we show experimental results<sup>2</sup>. In 5.1, we show how BNNs perform in the binary-space training compared to the real-space training. We then conduct analyses of hypermasks; specifically, we verify the validity of the EMP mask and its assumptions on a real-image dataset in 5.2.

### 5.1 EVALUATION OF PROPOSED METHODS

**Experimental setup.** This experiment aims to evaluate the performance of our proposed binary-space training of BNNs relative to the real-space training of BNNs across classification tasks on four real-image datasets: Digit Dataset (Alpaydin & Kaynak, 1998), MNIST (Lecun et al., 1998), CIFAR-10 (Krizhevsky, 2009), and Tiny-ImageNet (Le & Yang, 2015). We used fully connected networks (FCNs) with 4 layers. For baseline comparisons, we utilized STE (Hubara et al., 2016) for real-space training and a MIP-based method (Kurtz & Bah, 2021) for binary-space training. In the real-space training, each real-valued weight was initialized independently using a Gaussian distribution  $N(0, 0.01^2)$ . In the binary-space training, binary weights were initialized with a Bernoulli distribution  $B(p = 0.5)$ . For both EMP and MMP masks, the distribution  $P(\omega_0)$  was assumed Gaussian, given by  $N(0, (0.01/\eta)^2)$ . Comprehensive settings are detailed in Appendix B. Throughout the experiments, batch normalization (Ioffe & Szegedy, 2015) was used, with a set mean of 1 and a standard deviation of 0 for a fair comparison.

**Results.** Results are summarized in Tables 3 and 4. The difference in performance between the real- and binary-space training is a mere 0.03% on CIFAR-10. Notably, on both the Digit Dataset and Tiny-ImageNet, we observe slight improvements over the real-space training. The prior MIP-based method demands considerable training time as the dataset size grows, rendering it practically infeasible for larger datasets like MNIST. In contrast, our SGD-based binary-space technique is

<sup>2</sup>Our code will be published upon acceptance.

Table 3: Test errors (top-5 on Tiny-ImageNet) [%] of the large ( $D_{hid} = 8192$ ) FCN. For the MIP-based method (Kurtz & Bah, 2021), a 3-layered FCN ( $D_{hid} = 100$ ) was used.

|                         | $\Theta_{\text{train}}$ | Training Algorithm | Digit Dataset    | MNIST           | CIFAR-10         | Tiny-ImageNet    |
|-------------------------|-------------------------|--------------------|------------------|-----------------|------------------|------------------|
| BNN                     | $\mathbb{R}$            | SGD + STE †        | $2.58 \pm 0.31$  | $2.04 \pm 0.07$ | $59.12 \pm 0.93$ | $85.24 \pm 0.26$ |
|                         | $B$                     | MIP-based method   | $81.70 \pm 0.00$ | -               | -                | -                |
|                         |                         | EMP Mask ‡         | $2.41 \pm 0.65$  | $2.50 \pm 0.04$ | $59.15 \pm 0.77$ | $85.16 \pm 0.24$ |
| Degradation from † to ‡ |                         |                    | $-0.17 \pm 0.96$ | $0.46 \pm 0.11$ | $0.03 \pm 1.70$  | $-0.08 \pm 0.50$ |

Table 4: Test errors (top-1) [%] on MNIST with the mean and standard deviation over five different seeds. The best and second-best results are marked in bold and with an underline, respectively.

| $\Theta_{\text{train}}$ Training Algorithm              |              |                                   | Number of hidden units $D_{\text{hid}}$ |                                 |                                 |
|---------------------------------------------------------|--------------|-----------------------------------|-----------------------------------------|---------------------------------|---------------------------------|
|                                                         |              |                                   | 128 ( <i>Small</i> )                    | 2048 ( <i>Medium</i> )          | 8192 ( <i>Large</i> )           |
| NN                                                      | $\mathbb{R}$ | SGD + BP                          | 2.18 $\pm$ 0.17                         | 1.37 $\pm$ 0.05                 | 1.46 $\pm$ 0.03                 |
|                                                         | $\mathbb{R}$ | SGD + STE $\dagger$               | 5.81 $\pm$ 0.23                         | 2.10 $\pm$ 0.05                 | 2.04 $\pm$ 0.07                 |
| BNN                                                     | $B \ddagger$ | EMP mask                          | <b>6.82<math>\pm</math>0.09</b>         | <b>2.95<math>\pm</math>0.05</b> | 2.50 $\pm$ 0.04                 |
|                                                         |              | MMP mask                          | 51.32 $\pm$ 2.43                        | 22.34 $\pm$ 0.78                | 18.02 $\pm$ 0.31                |
|                                                         |              | Random mask, cosine decay         | <u>9.20<math>\pm</math>0.24</u>         | <u>3.04<math>\pm</math>0.03</u> | <b>2.44<math>\pm</math>0.04</b> |
|                                                         |              | Random mask, $\delta_t = 10^{-3}$ | 9.37 $\pm$ 0.12                         | 3.55 $\pm$ 0.09                 | 4.02 $\pm$ 0.06                 |
|                                                         |              | Random mask, $\delta_t = 1$       | 93.02 $\pm$ 1.91                        | 89.46 $\pm$ 4.29                | 86.70 $\pm$ 5.40                |
| Degradation from $\dagger$ to the minimum in $\ddagger$ |              |                                   | 1.01 $\pm$ 0.32                         | 0.85 $\pm$ 0.10                 | 0.40 $\pm$ 0.11                 |

computationally akin to standard SGD, making it suitable for larger datasets. As indicated in Table 4, the EMP mask consistently outperforms the other hypermasks across all model sizes on MNIST. The table also suggests that as the model size expands, the performance gap between real- and binary-space training narrows; thus, utilizing a more extensive model could potentially offset the observed  $\approx 0.4\%$  performance drop on MNIST. The MMP mask’s performance was subpar across all tested scenarios, attributed to underfitting due to a low weight update rate. This issue will be further explored in 5.2. Also, if  $\delta_t = 1$ , the random mask yielded results closely resembling random guesses, underscoring the challenges in directly extending real-space SGD to a binary space. However, by using the cosine-decay scheduler, the random mask performed surprisingly well to train the large BNN. In conclusion, these outcomes confirm that binary weights can be effectively trained without holding any real-valued weights.

## 5.2 VERIFICATION OF EMP MASK AND ITS ASSUMPTIONS

**Verification of EMP mask.** We empirically demonstrate that the EMP mask achieves the EMP. To substantiate this, we compare the mask probability  $P(M_t = 1|w_{t-1}, g_t)$  and the sign-flipping probability  $P(\hat{W}_t \neq w_{t-1}|w_{t-1}, g_t)$  in *real-space* training. If these probabilities align for all  $w_{t-1}$  and  $g_t$ , the EMP is satisfied as per Theorem 2. Figure 3 displays the results, juxtaposing the mask probabilities of hypermasks with the sign-flipping probabilities of the input layer in a small FCN trained on MNIST. Note that we used the actual standard deviations of the real weights as  $\sigma_{t-1}$  and  $w_{t-1} = 1$  for the mask probabilities. As illustrated on the left, there is a notable overlap between the EMP mask’s probability and the sign-flipping probability, *i.e.*, the EMP can be satisfied in binary-space training. As training advances, the peak value of the sign-flipping probability diminishes. By the second epoch, no probability exceeds 50%. Consequently, the MMP mask consistently takes 0, leading to underfitting in the binary-space training of BNNs, as evident in Table 4.

**Verification of assumptions.** During the binary-space training, certain assumptions were made to calculate the sign-flipping probability of the binary weights, *e.g.*,  $\Omega_{t-1} \perp\!\!\!\perp G_t$ ,  $G_t \sim N(0, \hat{g}_t^2)$  and  $\Omega_{t-1} \sim N(0, \sigma_{t-1}^2)$ . The left side of Figure 4 displays the distributions of the real-valued weights

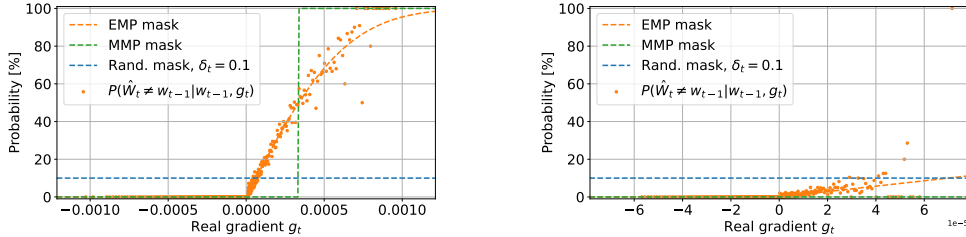

Figure 3: Mask probability  $P(M_t = 1|w_{t-1} = 1, g_t)$  and sign-flipping probability at the first (left) and second (right) epochs in the real-space training. The sign-flipping probability was calculated by dividing the gradient into several intervals and tabulating the sign-flipping rates of the real weights.



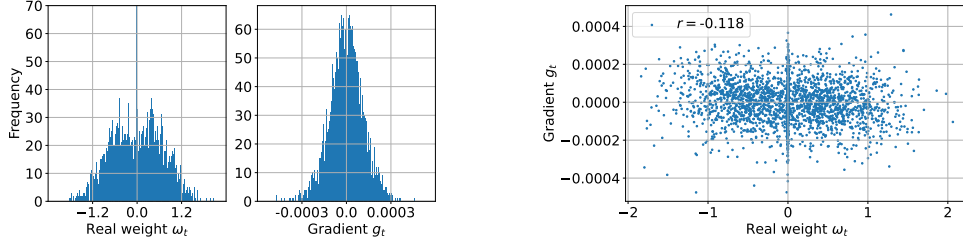

Figure 4: (Left) Real weight and gradient distributions of the output layer at the 10th epoch of the real-space training. (Right) Joint distribution of these variables ( $r$  is the correlation coefficient).

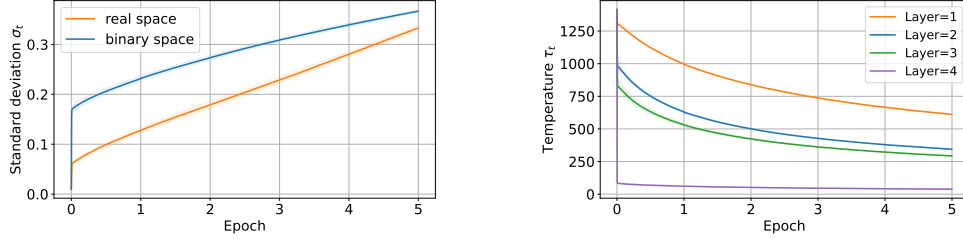

Figure 5: (Left) Standard deviations of the real weight of the output layer in the real- and binary-space training. Both used the same learning rate. In the binary-space training, the standard deviation is updated by Eq. (16). (Right) Auto temperature schedule of all layers in the binary space training.

and gradient at the 10-th epoch during the real-space training of a small FCN on MNIST. As depicted, the real-valued weight distribution initialized by the Gaussian distribution basically preserves its form, and the gradient also obeys a zero-mean Gaussian distribution. The joint distribution is shown in the right of Figure 4, and the correlation coefficient of  $r = -0.118$  suggests near-independence between the distributions. However, in BNNs, these distributions might deviate from the Gaussian form as the training progresses (See Appendix C). Moreover, the correlation coefficient is small but not negligible. These facts could prevent the binary-space training from accurately emulating the real-space training. Figure 5 shows the standard deviation of the hypothetical distribution of the real-valued weight in the binary-space training of this setting, and it is slightly different from that of the actual distribution in the real-space training. A more precise assumption regarding distribution, coupled with a deeper exploration of the dependence between real-valued weights and gradients, could enhance the fidelity of binary-space training emulation and further refine our method.

## 6 DISCUSSION

Prior work largely trained low-precision weights through gradient quantization or model-based discrete optimization like MIP. This study’s major contribution is the introduction of a novel approach for directly training ultra-low precision 1-bit weights. This method yielded performance comparable to BNNs trained with real-valued weights using traditional real-space SGD. Also, our approach has a computational complexity nearly identical to SGD, alleviating the challenges of MIP-based methods on large datasets. We conclude by discussing the study’s limitations and prospects for future research.

**ImageNet-scale dataset.** We conducted experiments with one of the most standard NN types, the fully connected networks, to provide a direct comparison between training BNNs with and without real-valued weights. Conducting experiments with datasets similar in scale to ImageNet demands architectures based on CNN or ViT. Training BNNs with such architectures necessitates numerous structural adjustments, such as pooling and attention. While various strategies have been explored to address these structural challenges, integrating them with our method wasn’t the focus of this paper, which emphasized a direct comparison. This integration will be a topic for future research.

**Further memory reduction.** In our method, real-valued gradients estimate the probability of binary weight sign-flipping, representing the memory consumption bottleneck during training. Quantizing these real-valued gradients has been recognized as an effective strategy in BNNs (Zhou et al., 2016; Wang et al., 2021). Incorporating this quantization into our methods would alleviate this bottleneck.

**Ethics statement.** Our proposed binary-space training for BNNs is anticipated to facilitate the localization and personalization of AI systems on low-end edge devices. Nevertheless, excessive bias in the data employed for local training may yield unforeseen device behavior, and to circumvent this, it may be imperative to devise a method to assess the validity of local learning.

**Reproducibility statement.** To reproduce the results of the experiments, the source code and hyperparameters used in the experiments are included in the supplementary material. See Appendix B and the attached code.

## REFERENCES

- E. Alpaydin and C. Kaynak. Optical recognition of handwritten digits. In *UCI Machine Learning Repository*, 1998.
- Animashree Anandkumar, Rong Ge, Daniel Hsu, Sham M. Kakade, and aMatus Telgarsky. Tensor decompositions for learning latent variable models. *Journal of Machine Learning Research*, 15: 2773–2832, 2014.
- Dzmitry Bahdanau, Kyunghyun Cho, and Yoshua Bengio. Neural machine translation by jointly learning to align and translate. In *ICLR*, 2015.
- Yoshua Bengio, Nicholas Léonard, and Aaron Courville. Estimating or propagating gradients through stochastic neurons for conditional computation. *arXiv preprint arXiv:1308.3432*, 2013.
- Yash Bhalgat, Jinwon Lee, Markus Nagel, Tijmen Blankevoort, and Nojun Kwak. Lsq+: Improving low-bit quantization through learnable offsets and better initialization. In *CVPR*, 2020.
- Adrian Bulat and Georgios Tzimiropoulos. Xnor-net++: Improved binary neural networks. In *BMVC*, 2019.
- Zhaowei Cai, Xiaodong He, Jian Sun, and Nuno Vasconcelos. Deep learning with low precision by half-wave gaussian quantization. In *CVPR*, 2017.
- Matthieu Courbariaux, Yoshua Bengio, and Jean-Pierre David. Binaryconnect: Training deep neural networks with binary weights during propagations. In *NeurIPS*, 2015.
- Sajad Darabi, Mouloud Belbahri, Matthieu Courbariaux, and Vahid Partovi Nia. Bnn+: Improved binary network training. *arXiv preprint arXiv:1812.11800*, 2018.
- Alexey Dosovitskiy, Lucas Beyer, Alexander Kolesnikov, Dirk Weissenborn, Xiaohua Zhai, Thomas Unterthiner, Mostafa Dehghani, Matthias Minderer, Georg Heigold, Sylvain Gelly, Jakob Uszkoreit, and Neil Houlsby. An image is worth 16x16 words: Transformers for image recognition at scale. In *ICLR*, 2021.
- Steven K. Esser, Jeffrey L. McKinstry, Deepika Bablani, Rathinakumar Appuswamy, and Dharmendra S. Modha. Learned step size quantization. In *ICLR*, 2020.
- Ruihao Gong, Xianglong Liu, Shenghu Jiang, Tianxiang Li, Peng Hu, Jiazhen Lin, Fengwei Yu, and Junjie Yan. Differentiable soft quantization: Bridging full-precision and low-bit neural networks. In *ICCV*, 2019.
- Suyog Gupta, Ankur Agrawal, Kailash Gopalakrishnan, and Pritish Narayanan. Deep learning with limited numerical precision. In *ICML*, 2015.
- Kaiming He, Xiangyu Zhang, Shaoqing Ren, and Jian Sun. Deep residual learning for image recognition. In *CVPR*, 2016.
- Geoffrey Hinton, Oriol Vinyals, and Jeff Dean. Distilling the knowledge in a neural network. *arXiv preprint arXiv:1503.02531*, 2015.
- Itay Hubara, Matthieu Courbariaux, Daniel Soudry, Ran El-Yaniv, and Yoshua Bengio. Binarized neural networks. In *NeurIPS*, 2016.

- Sergey Ioffe and Christian Szegedy. Batch normalization: Accelerating deep network training by reducing internal covariate shift. In *ICML*, 2015.
- Alex Krizhevsky. Learning multiple layers of features from tiny images. *Technical Report*, 2009.
- Jannis Kurtz and Bubacarr Bah. Efficient and robust mixed-integer optimization methods for training binarized deep neural networks. *arXiv preprint arXiv:2110.11382*, 2021.
- Ya Le and Xuan Yang. Tiny imagenet visual recognition challenge. *CS 231N*, 7(7):3, 2015.
- Y. Lecun, L. Bottou, Y. Bengio, and P. Haffner. Gradient-based learning applied to document recognition. *IEEE*, 86:2278–2324, 1998.
- Hao Li, Asim Kadav, Igor Durdanovic, Hanan Samet, and Hans Peter Graf. Tensor decompositions and applications. *SIAM*, 51:455–500, 2009.
- Hao Li, Asim Kadav, Igor Durdanovic, Hanan Samet, and Hans Peter Graf. Pruning filters for efficient convnets. In *ICLR*, 2017.
- Zechun Liu, Baoyuan Wu, Wenhan Luo, Xin Yang, Wei Liu, , and Kwang-Ting Cheng. Bi-real net: Enhancing the performance of 1-bit cnns with improved representational capability and advanced training algorithm. In *ECCV*, 2018.
- Zhenhua Liu, Yunhe Wang, Kai Han, Wei Zhang, Siwei Ma, and Wen Gao. Post-training quantization for vision transformer. In *NeurIPS*, 2021.
- Ilya Loshchilov and Frank Hutter. Sgdr: Stochastic gradient descent with warm restarts. In *ICLR*, 2017.
- Brais Martinez, Jing Yang, Adrian Bulat, and Georgios Tzimiropoulos. Training binary neural networks with real-to-binary convolutions. In *ICLR*, 2020.
- Joe Mellor, Jack Turner, Amos Storkey, and Elliot J. Crowley. Neural architecture search without training. In *ICML*, volume 139, pp. 588–7598, 2021.
- Fanxu Meng, Hao Cheng, Ke Li, Huixiang Luo, Xiaowei Guo, Guangming Lu, and Xing Sun. Pruning filter in filter. In *NeurIPS*, 2020.
- Haotong Qin, Ruihao Gong, Xianglong Liu, Xiao Bai, Jingkuan Song, and Nicu Sebe. Binary neural networks: A survey. *Pattern Recognition*, 105, 2020.
- Haotong Qin, Mingyuan Zhang, Yifu Ding, Aoyu Li, Zhongang Cai, Ziwei Liu, Fisher Yu, and Xianglong Liu. Bibench: Benchmarking and analyzing network binarization. In *ICML*, 2023.
- Mohammad Rastegari, Joseph Redmon Vicente Ordonez, and Ali Farhadi. Xnor-net: Imagenet classification using binary convolutional neural networks. In *ECCV*, 2016.
- Tal Rozen, Moshe Kimhi, Brian Chmiel, Avi Mendelson, and Chaim Baskin. Bimodal-distributed binarized neural networks. *Mathematics*, 10:4107, 2022.
- Xiao Sun, Naigang Wang, Chia yu Chen, Jia min Ni, Ankur Agrawal, Xiaodong Cui, Swagath Venkataramani, Kaoutar El Maghraoui, Vijayalakshmi Srinivasan, and Kailash Gopalakrishnan. Ultra-low precision 4-bit training of deep neural networks. In *NeurIPS*, 2020.
- Erwei Wang, James Davis, Daniele Moro, Piotr Zielinski, Jia Jie Lim, Claudionor Coelho, Satrajit Chatterjee, Peter Cheung, and George Constantinides. Enabling binary neural network training on the edge. In *Workshop on EMDL*, 2021.
- Yixing Xu, Kai Han, Chang Xu, Yehui Tang, Chunjing Xu, and Yunhe Wang. Learning frequency domain approximation for binary neural networks. In *NeurIPS*, 2021.
- Junho Yim, Donggyu Joo, Jihoon Bae, and Junmo Kim. A gift from knowledge distillation: Fast optimization, network minimization and transfer learning. In *CVPR*, pp. 4133–4141, 2017.
- Shuchang Zhou, Yuxin Wu, Zekun Ni, Xinyu Zhou, He Wen, and Yuheng Zou. Dorefa-net: Training low bitwidth convolutional neural networks with low bitwidth gradients. *arXiv preprint arXiv:1606.06160*, 2016.
- Barret Zoph and Quoc Le. Neural architecture search with reinforcement learning. In *ICLR*, 2017.

## A PROOF OF THEOREMS

**Proof of Theorem 1.** Assume that  $\Omega_{t-1} \perp\!\!\!\perp G_t$ , then we have

$$\begin{aligned}
 p(\hat{w}_t | w_{t-1}, g_t) &= \frac{p(\hat{w}_t, w_{t-1}, g_t)}{p(w_{t-1}, g_t)} \\
 &= \int_{-\infty}^{\infty} \int_{-\infty}^{\infty} \frac{p(\hat{w}_t, w_{t-1}, g_t, \omega_t, \omega_{t-1})}{p(w_{t-1}, g_t)} d\omega_t d\omega_{t-1} \\
 &= \int_{-\infty}^{\infty} \int_{-\infty}^{\infty} \frac{p(\omega_t | \omega_{t-1}, g_t) p(\hat{w}_t | \omega_t) p(w_{t-1} | \omega_{t-1}) p(\omega_{t-1}) p(g_t)}{p(w_{t-1}) p(g_t)} d\omega_t d\omega_{t-1} \\
 &= \int_{-\infty}^{\infty} \int_{-\infty}^{\infty} p(\omega_t | \omega_{t-1}, g_t) p(\hat{w}_t | \omega_t) p(w_{t-1} | \omega_{t-1}) d\omega_t d\omega_{t-1}. \tag{19}
 \end{aligned}$$

For simplicity, we consider the case where  $w_{t-1} = 1$  and  $\hat{w}_t = 0$  in the following. In this case, the following two equations hold:

$$p(\hat{w}_t = 0 | \omega_t) = \begin{cases} 1 & (\omega_t < 0) \\ 0 & (\omega_t \geq 0) \end{cases}, \tag{20}$$

$$p(\omega_{t-1} | w_{t-1} = 1) = \begin{cases} 2\varphi(\omega_{t-1}) & (\omega_{t-1} \geq 0) \\ 0 & (\omega_{t-1} < 0) \end{cases}. \tag{21}$$

By substituting Eqs. (20-21) into Eq. (19), we have the following expression:

$$p(\hat{w}_t = 0 | w_{t-1} = 1, g_t) = 2 \int_0^{\infty} \varphi(\omega_{t-1}) \left( \int_{-\infty}^0 p(\omega_t | \omega_{t-1}, g_t) d\omega_t \right) d\omega_{t-1}. \tag{22}$$

Considering the update rule of  $\omega_t$  (Eq. (4)), we have

$$p(\omega_t | \omega_{t-1}, g_t) = \delta(\omega_{t-1} - \eta g_t - \omega_t), \tag{23}$$

where  $\delta$  is a Dirac's delta. It's easy to check that

$$\int_{-\infty}^0 p(\omega_t | \omega_{t-1}, g_t) d\omega_t = \begin{cases} 1 & (\omega_{t-1} < \eta g_t) \\ 0 & (\text{otherwise}) \end{cases}, \tag{24}$$

and by substituting Eq. (24) into Eq. (22), we finally obtain the following equality:

$$p(\hat{w}_t \neq w_{t-1} | w_{t-1} = 1, g_t) = 2 \int_0^{\max(\eta g_t, 0)} \varphi(\omega_{t-1}) d\omega_{t-1}. \tag{25}$$

The same derivation can also be done for the another case  $w_{t-1} = 0$ . From the above, Eq. (13) has been proved.

**Proof of Theorem 2.** The EMP is equivalent to

$$\forall w_{t-1}, g_t \quad P(W_t = 1 | w_{t-1}, g_t) = P(\hat{W}_t = 1 | w_{t-1}, g_t). \tag{26}$$

Also, Table 5 shows the four patterns of the combination of  $w_{t-1}$  and  $g_t$ . From the table, Eq. (26) is equivalent to

$$\begin{aligned}
 P(\bar{M}_t = 1 | w_{t-1} = 1, g_t \geq 0) &= P(\hat{W}_t = 1 | w_{t-1} = 1, g_t \geq 0) \\
 \wedge P(M_t = 1 | w_{t-1} = 0, g_t < 0) &= P(\hat{W}_t = 1 | w_{t-1} = 0, g_t < 0)
 \end{aligned} \tag{27}$$

Thus, the EMP is satisfied if and only if the mask probability satisfies

$$\begin{aligned}
 P(M_t = 1 | w_{t-1}, g_t) &= P(\hat{W}_t \neq w_{t-1} | w_{t-1}, g_t) \\
 &= ((w_{t-1} = 1 \wedge g_t \geq 0) \vee (w_{t-1} = 0 \wedge g_t < 0))
 \end{aligned} \tag{28}$$

The EMP mask obviously satisfies Eq. (28) and then the theorem is proved.

**Proof of Theorem 3.** The MP is equivalent to

$$\begin{aligned}
& \forall w_{t-1}, g_t \text{ MP} \\
& = P(W_t = 1|w_{t-1}, g_t)P(\hat{W}_t = 1|w_{t-1}, g_t) \\
& + (1 - P(W_t = 1|w_{t-1}, g_t))(1 - P(\hat{W}_t = 1|w_{t-1}, g_t)) \\
& = (2P(\hat{W}_t = 1|w_{t-1}, g_t) - 1)P(W_t = 1|w_{t-1}, g_t) \\
& + 1 - P(\hat{W}_t = 1|w_{t-1}, g_t). \tag{29}
\end{aligned}$$

Table 5: Values of  $W_t$  in each  $w_{t-1}$  and  $g_t$  combination.

| $w_{t-1}$ | 1           | 1 | 0 | 0     |
|-----------|-------------|---|---|-------|
| $g_t$     | +           | - | + | -     |
| $W_t$     | $\bar{M}_t$ | 1 | 0 | $M_t$ |

The probability  $P(W_t = 1|w_{t-1}, g_t)$  maximizes MP if and only if

$$\begin{aligned}
& \left( P(\hat{W}_t = 1|w_{t-1}, g_t) \geq \frac{1}{2} \Rightarrow P(W_t = 1|w_{t-1}, g_t) = 1 \right) \\
& \wedge \left( P(\hat{W}_t = 1|w_{t-1}, g_t) < \frac{1}{2} \Rightarrow P(W_t = 1|w_{t-1}, g_t) = 0 \right). \tag{30}
\end{aligned}$$

Using Table 5, it is easy to show that Theorem 3 holds as well as Theorem 2.

## B DETAILED SETTINGS OF EXPERIMENTS

This section reports the detailed settings of the experiments in Section 5. For the experiments, 4 GPUs (Tesla P100-SXM2-16GB) with 56 CPU cores were used.

### B.1 HYPERPARAMETERS

**Experiment 5.1.** For all training algorithms and all datasets, we initialized the real-valued weights by random values sampled from Gaussian distribution  $N(0, 0.01^2)$  and the binary-valued weights by random values sampled from Bernoulli distribution  $B(p = 0.5)$ . The standard deviation  $\sigma_0$  of the distribution of the real-valued weight in the binary-space training was assumed to be  $0.01/\eta$ . The batch size was 16,384 for all experiments. The numbers of the training epochs were 1,000 on Digit Dataset, 2,000 on MNIST, 500 on CIFAR-10, and 100 on Tiny ImageNet.

Table 6 shows the search sets of the learning rate  $\eta$  for the real- and binary-space training and a probability  $\delta$  for the random mask. These search sets were determined by a rough tuning of 10-fold intervals.

Table 6: Search sets of hyperparameters used in 5.1 for all dataset. The search set of learning rate is defined as  $\{\text{round}(10^{x/10}) : x = 0, \dots, 10\}$ .

| Hyperparameter       | Search Set                                                   |
|----------------------|--------------------------------------------------------------|
| Learning rate $\eta$ | $\{1.0, 1.3, 1.6, 2.0, 2.5, 3.2, 4.0, 5.0, 6.3, 7.9, 10.0\}$ |
| Delta $\delta$       | $\{10^{-1}, 10^{-2}, 10^{-3}, 10^{-4}\}$                     |

The best hyperparameters used in Tables 3 and 4 are shown in Tables 7 and 8, respectively. To find these best hyperparameters, a grid search was used; 10% of the training data were used as a validation set, and the hyperparameter which obtained the best validation performance at the 100th epoch was chosen as the best hyperparameter. The values of hyperparameters for the real-space training were set equal to those for the binary-space training. This is because learning rate works the same in real- and binary-space training.

**Experiments 5.2** In these experiments, we used the small FCN ( $D_{hid} = 256$ ) as the training model and the MNIST as the dataset.

Figure 3 shows the mask and sign-flipping distributions of the input layer in the real-space training. We used  $\eta = 20$  as the learning rate and  $\sigma_0 = 0.01$  as the initial value of the standard deviation of the real-valued weight.

Table 7: Learning rate  $\eta$  used in Table 3

|          | Dataset       |       |          |               |
|----------|---------------|-------|----------|---------------|
|          | Digit Dataset | MNIST | CIFAR-10 | Tiny-ImageNet |
| SGD+STE  | 6.3           | 10.0  | 6.3      | 1.0           |
| EMP mask | 6.3           | 10.0  | 6.3      | 1.0           |

Table 8: Best hyperparameters used in Table 4. We used a different search set for MMP mask.

| $D_{hid}$ | Hyperparameter       | STE  | EMP mask | MMP Mask | Random mask (cosine decay) |
|-----------|----------------------|------|----------|----------|----------------------------|
| 128       | Learning Rate $\eta$ | 10.0 | 10.0     | 63       | -                          |
|           | Delta $\delta$       | -    | -        | -        | $10^{-3}$                  |
| 2048      | Learning Rate $\eta$ | 7.9  | 7.9      | 63       | -                          |
|           | Delta $\delta$       | -    | -        | -        | $10^{-3}$                  |
| 8192      | Learning Rate $\eta$ | 10.0 | 10.0     | 63       | -                          |
|           | Delta $\delta$       | -    | -        | -        | $10^{-3}$                  |

Figure 4 shows the distributions of the real-valued weight and gradient (left) and the joint distribution of them (right) of the output layer in the real-space training. We used  $\eta = 20$  as the learning rate and  $\sigma_0 = 0.01$  as the initial value of the standard deviation of the real-valued weight.

Figure 5 shows the standard deviations of the real-valued weight of the output layer in the real- and binary-space training (left) and the temperature in the binary-space training (right). In the left figure, the standard deviation in the binary-space training is that of the hypothetical distribution  $P(\Omega_t)$  which is updated by Eq. (16). The learning rates of the real- and binary-space training were set to the same value  $\eta = 20$ . In the right figure, the same learning rate  $\eta = 20$  was used.

## C DISTRIBUTIONS OF THE REAL-VALUED WEIGHT AND GRADIENT

In this section, we provide the additional analysis of the distributions of the real-valued weight and gradient in addition to 5.2. Here, we used the small ( $D_{hid} = 256$ ) and large ( $D_{hid} = 8192$ ) FCNs as the training models and the MNIST as the dataset.

### C.1 WEIGHT DISTRIBUTION

In the construction of the hypermasks, we assumed a Gaussian distribution as the prior distribution of real-valued weights. Here, we validate the validity of this assumption in addition to 5.2. Figures 8 and 9 show the real-valued weight distribution of BNNs trained in the real space. As the figures show, in the small BNN, it is observed that the real-valued weight distribution, initialized with a Gaussian distribution, diverges from the Gaussian distribution over time as training progresses, with the number of elements near zero increasing. This phenomenon is particularly pronounced in the output layer. On the other hand, in the large BNN, deviations from the Gaussian distribution occur almost exclusively in the output layer, and even there, the deviation is minimal compared to that in the small model. The size-dependent performance improvement observed in the binary-space training could potentially be attributed to the extent of this distribution collapse.

### C.2 GRADIENT DISTRIBUTIONS

Next, we confirm the validity of the approximation of the real-valued gradient by a Gaussian distribution during the update of  $\tau_t$ . Figures 8 and 9 show the distribution of real-valued gradients. As can be seen from the figures, from the second layer onwards, the distribution takes a shape similar to a Gaussian distribution at the initial stage of learning, but as learning progresses, the distribution in the upper layers becomes multi-modal, diverging from the Gaussian distribution. This is thought to be due to the fact that as the realizations of the binary weights become limited in the upper layers

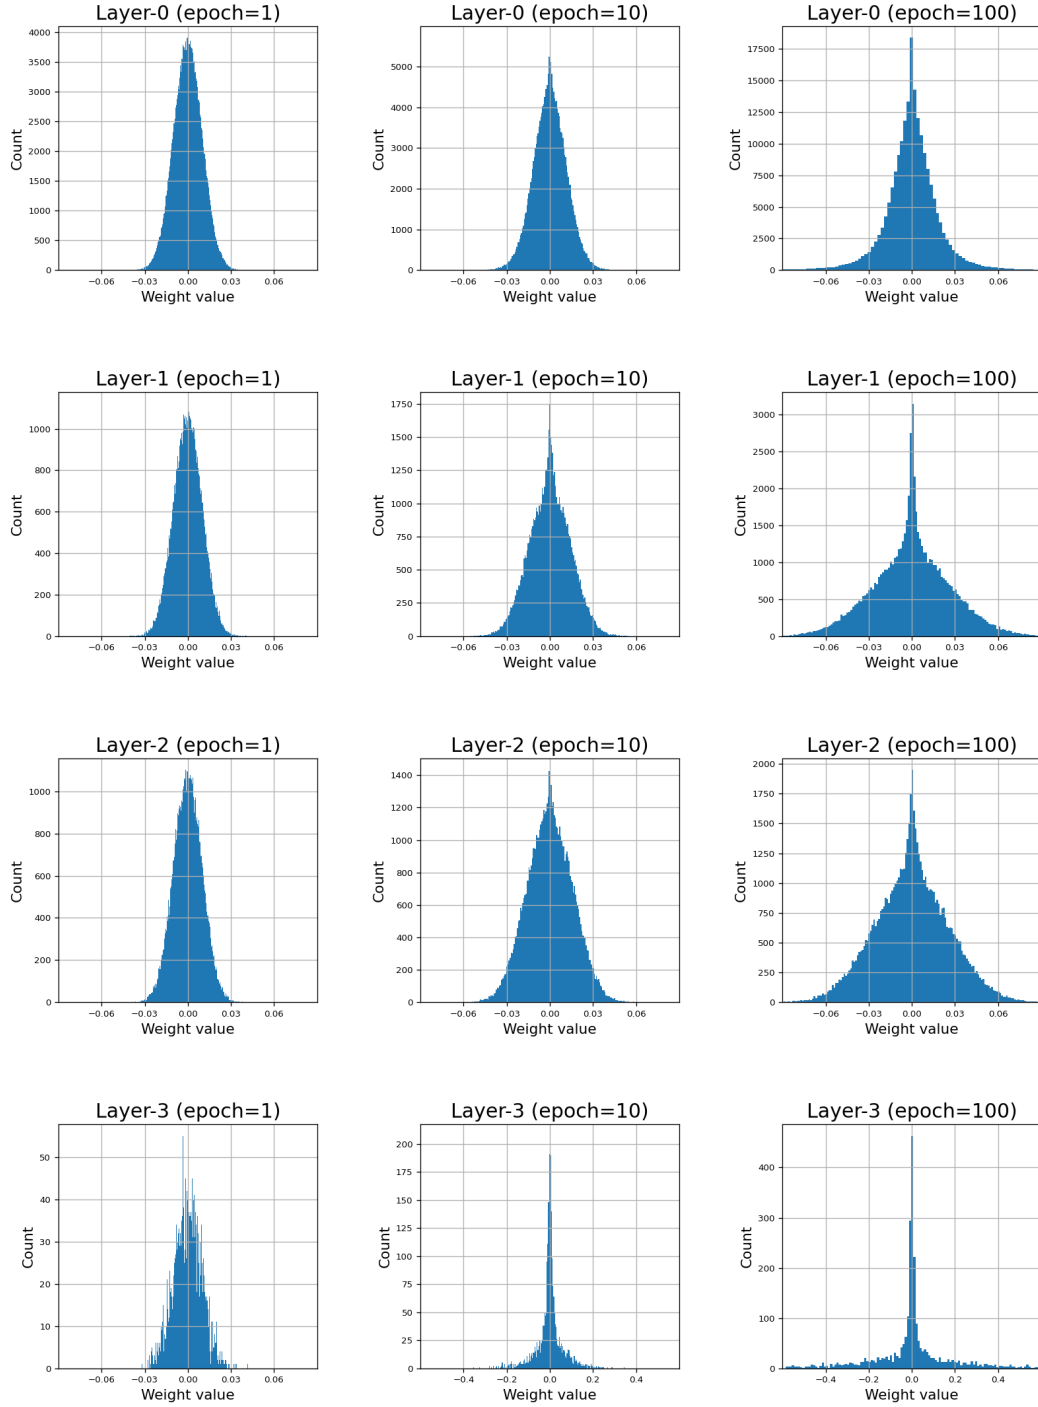

Figure 6: Weight distributions of the smaller BNN on MNIST.

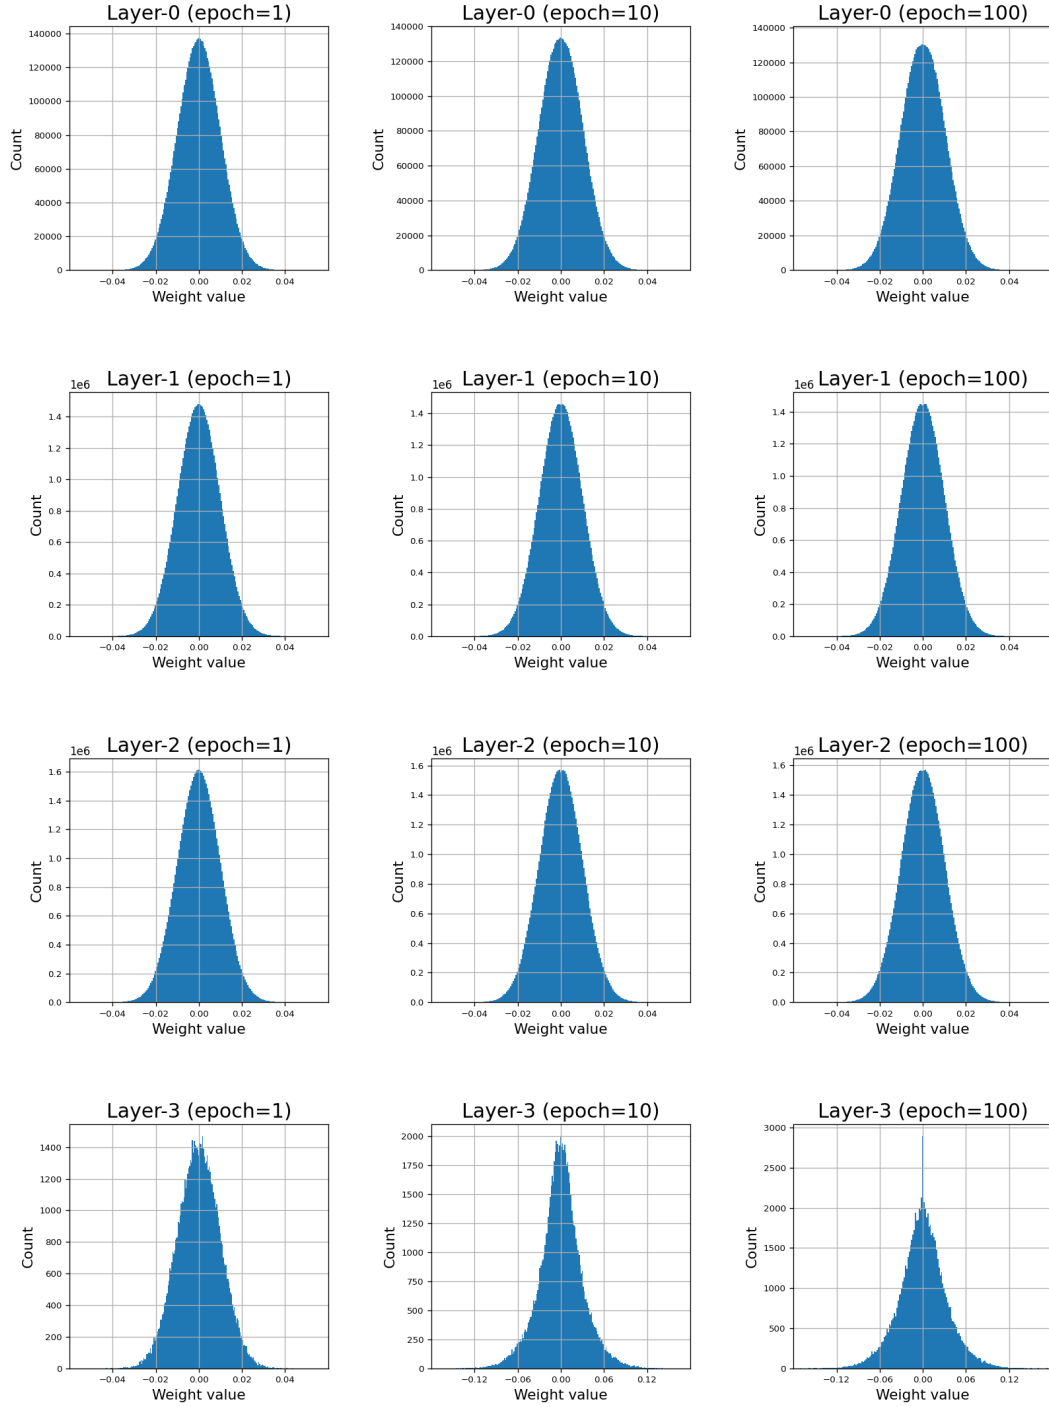

Figure 7: Weight distributions of the larger BNN on MNIST.



as the training progresses, the realizations of the gradients are also limited. In the first layer, there are significantly many values near zero, deviating from the shape of the Gaussian distribution from the initial stage of learning. Reflecting these trends to the approximation of the real-valued gradient could potentially improve the binary-space training of BNNs.

## D PERFORMANCE UNDER VARIOUS SETTINGS

In this section, we evaluate the proposed hypermasks under settings different from those in the main paper. Specifically, we experimentally investigate the changes in performance when the dimension of the hidden layers and batch size. We used the MNIST as the dataset.

**Number of hidden units** We investigate the performance improvement of the proposed method when the number of hidden units is increased while keeping the batch size constant ( $B = 16, 384$ ). The number of epochs was set to 2,000. Table 9 and Figure 10 show the results. As these results show, in the proposed methods, the degradation from the real-space training to the binary-space training decreases as the number of the hidden units increases, and further performance improvement can be expected by increasing the dimension from 8192.

**Batch size** Next, we investigate the performance of the proposed method when the number of batch size is increased while keeping the number of the hidden units constant ( $D_{hid} = 1024$ ). The number of epochs was set to 200. The results are in Table 10 and Figure 11. As these results demonstrate, the performance of the proposed methods become better as the batch size increases. One possible reason for this is that, in training in a real space, real-valued weights can memorize local optima for multiple batches, whereas in a binary space, memorization is difficult since the 1-bit weight can retain less information.

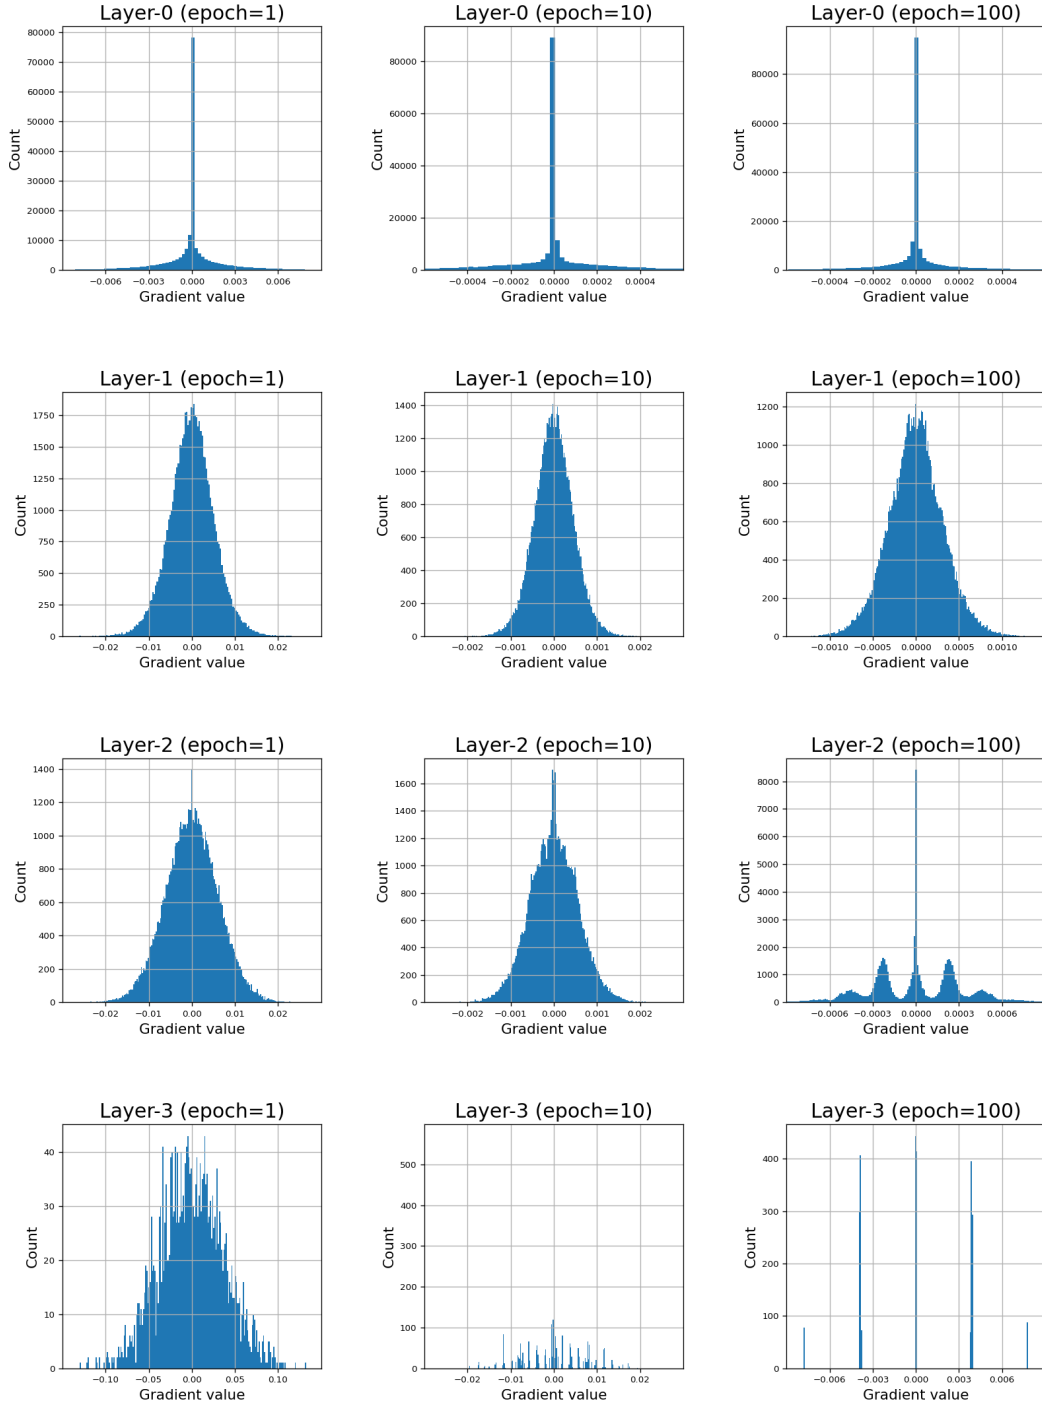

Figure 8: Gradient distributions of the smaller BNN on MNIST.

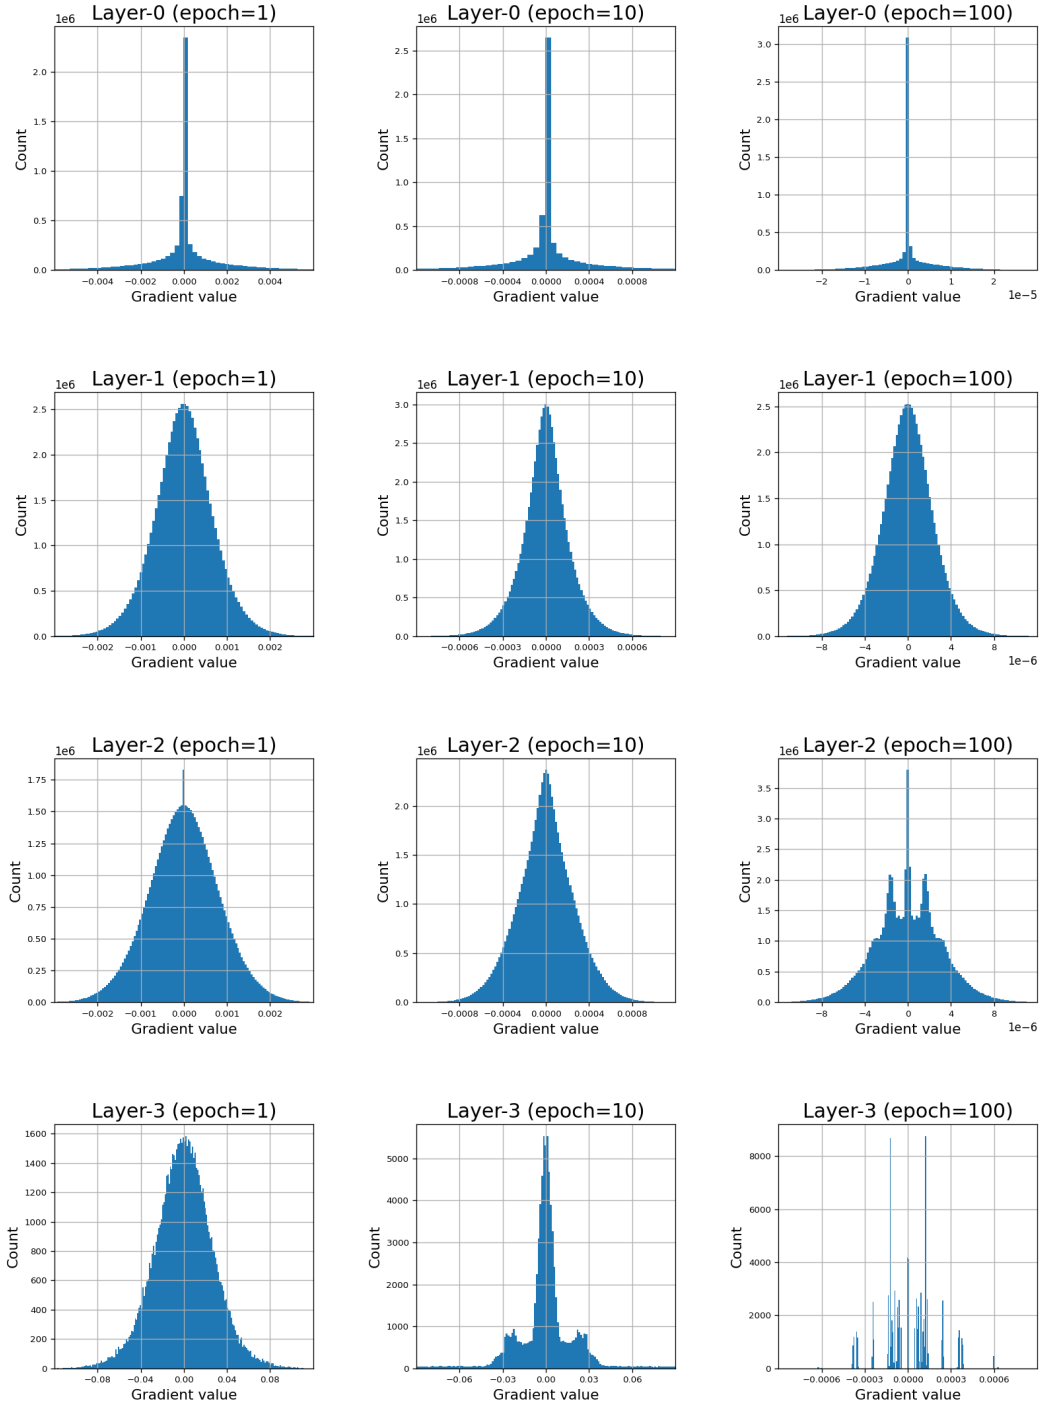

Figure 9: Gradient distributions of the larger BNN on MNIST.

Table 9: Test errors (top-1) [%] on MNIST with the mean and standard deviation over five different seeds. The batch size is 16,384. The best and the second best results are marked in bold and with an underline, respectively. The number of epochs was 2000.

| $D_{hid}$ | Training Algorithm |                 |                 |
|-----------|--------------------|-----------------|-----------------|
|           | SGD + BP           | SGD + STE       | EMP mask        |
| 128       | 2.18 $\pm$ 0.17    | 5.81 $\pm$ 0.23 | 6.82 $\pm$ 0.09 |
| 256       | 1.83 $\pm$ 0.08    | 3.81 $\pm$ 0.12 | 5.05 $\pm$ 0.09 |
| 512       | 1.64 $\pm$ 0.05    | 2.61 $\pm$ 0.07 | 4.04 $\pm$ 0.11 |
| 1024      | 1.46 $\pm$ 0.08    | 2.31 $\pm$ 0.08 | 3.33 $\pm$ 0.05 |
| 2048      | 1.37 $\pm$ 0.05    | 2.10 $\pm$ 0.05 | 2.95 $\pm$ 0.05 |
| 4096      | 1.37 $\pm$ 0.07    | 2.10 $\pm$ 0.07 | 2.65 $\pm$ 0.06 |
| 8192      | 1.46 $\pm$ 0.03    | 2.04 $\pm$ 0.07 | 2.50 $\pm$ 0.04 |

Table 10: Test errors (top-1) [%] on MNIST with the mean and standard deviation over five different seeds. The number of the hidden units is 2,048. The best and the second best results are marked in bold and with an underline, respectively.

| $B$  | Training Algorithm |                 |
|------|--------------------|-----------------|
|      | SGD + STE          | EMP mask        |
| 128  | 2.06 $\pm$ 0.10    | 9.42 $\pm$ 0.17 |
| 256  | 2.21 $\pm$ 0.33    | 8.04 $\pm$ 0.09 |
| 512  | 2.18 $\pm$ 0.18    | 6.94 $\pm$ 0.07 |
| 1024 | 2.00 $\pm$ 0.14    | 5.66 $\pm$ 0.08 |
| 2048 | 2.68 $\pm$ 0.09    | 4.82 $\pm$ 0.08 |
| 4096 | 2.66 $\pm$ 0.08    | 4.22 $\pm$ 0.10 |
| 8192 | 3.09 $\pm$ 0.08    | 3.90 $\pm$ 0.12 |

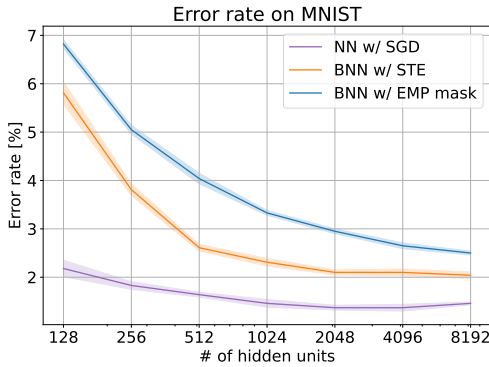

Figure 10: Change in test error [%] as number of hidden units increases.

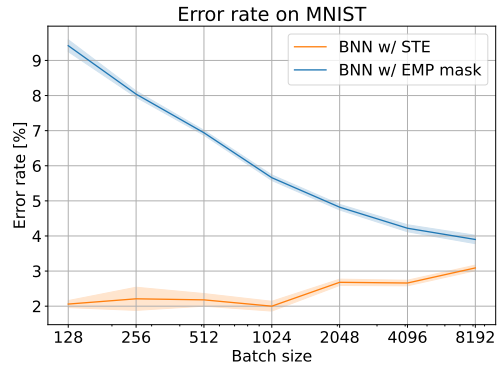

Figure 11: Change in test error [%] as batch size increases.

## E HYPERMASK TO MINIMIZE WEIGHT UPDATE ANGLE

Here, we investigate a hypermask that explicitly minimizes the angle between the real-valued gradient  $\mathbf{g}_t$  and the update direction of binary weights  $\mathbf{w}_t - \mathbf{w}_{t-1}$ , where  $\mathbf{g}_t \in \mathbb{R}^N$  and  $\mathbf{w}_t, \mathbf{w}_{t-1} \in B^N = \{0, 1\}^N$ . This hypermask is formulated as

$$\mathbf{m}_t^* = \operatorname{argmin}_{\mathbf{m}_t} \angle(-\mathbf{g}_t, \mathbf{w}_t - \mathbf{w}_{t-1}). \quad (31)$$

**Proposition.** Define  $I_1 = \{i \mid w_{t-1,i} = 1, \llbracket -g_{t,i} > 0 \rrbracket = 0\}$ ,  $I_2 = \{i \mid w_{t-1,i} = 0, \llbracket -g_{t,i} > 0 \rrbracket = 1\}$ ,  $I = I_1 \cup I_2$  and  $\tilde{\mathbf{g}}_t$  by

$$\tilde{g}_{t,i} = \begin{cases} g_{t,i} & (i \in I) \\ 0 & (i \notin I) \end{cases}, \quad (32)$$

then, the optimal hypermask  $\mathbf{m}_t^*$  is given by

$$\mathbf{m}_t^* = \operatorname{argmin}_{\mathbf{m}_t} \angle(\operatorname{abs}(\tilde{\mathbf{g}}_t), \mathbf{m}_t) \quad \text{s.t.} \quad m_{t,i} = 0 \quad (i \notin I) \quad (33)$$

*Proof.* For the update direction of binary weights, the following equality holds:

$$\begin{aligned} \mathbf{w}_t - \mathbf{w}_{t-1} &= (\bar{\mathbf{m}}_t \mathbf{w}_{t-1} \vee \mathbf{m}_t \llbracket -\mathbf{g}_t \geq 0 \rrbracket) - \mathbf{w}_{t-1} \\ &= -\mathbf{m}_t \odot (\mathbf{w}_{t-1} - \llbracket -\mathbf{g}_t > 0 \rrbracket), \end{aligned} \quad (34)$$

where  $\odot$  is an element-wise multiplication (Hadamard product). From the monotonicity of  $\cos^{-1}(\cdot)$ , we have

$$\begin{aligned} &\operatorname{argmin}_{\mathbf{m}_t} \angle(\mathbf{g}_t, \mathbf{m}_t \odot (\mathbf{w}_{t-1} - \llbracket -\mathbf{g}_t > 0 \rrbracket)) \\ &= \operatorname{argmin}_{\mathbf{m}_t} \cos^{-1} \left( \frac{\sum_{i \in I_1} g_{t,i} m_{t,i} + \sum_{i \in I_2} g_{t,i} (-m_{t,i})}{\sqrt{\sum_{i=1}^N g_{t,i}^2} \sqrt{\sum_{i \in I_1} m_{t,i}^2 + \sum_{i \in I_2} (-m_{t,i})^2}} \right) \\ &= \operatorname{argmin}_{\mathbf{m}_t} \cos^{-1} \left( \sqrt{\frac{\sum_{i \in I} |g_{t,i}|^2}{\sum_{i=1}^N g_{t,i}^2}} \times \frac{\sum_{i \in I} |g_{t,i}| m_{t,i}}{\sqrt{(\sum_{i \in I} |g_{t,i}|^2) (\sum_{i \in I} m_{t,i}^2)}} \right) \\ &= \operatorname{argmin}_{\mathbf{m}_t} \cos^{-1} \left( \frac{\sum_{i \in I} |g_{t,i}| m_{t,i}}{\sqrt{(\sum_{i \in I} |g_{t,i}|^2) (\sum_{i \in I} m_{t,i}^2)}} \right). \end{aligned} \quad (35)$$

Here, let  $m_{t,i}$  be fixed with 0 if  $i \notin I$ , then we obtain the following equation:

$$\begin{aligned} \operatorname{argmin}_{\mathbf{m}_t} \angle(-\mathbf{g}_t, \mathbf{w}_t - \mathbf{w}_{t-1}) &= \operatorname{argmin}_{\mathbf{m}_t} \cos^{-1} \left( \frac{\operatorname{abs}(\tilde{\mathbf{g}}_t) \cdot \mathbf{m}_t}{\|\operatorname{abs}(\tilde{\mathbf{g}}_t)\|_2 \|\mathbf{m}_t\|_2} \right) \\ &= \operatorname{argmin}_{\mathbf{m}_t} \angle(\operatorname{abs}(\tilde{\mathbf{g}}_t), \mathbf{m}_t) \end{aligned} \quad (36)$$

The proposition is thus proved.  $\square$

To obtain approximate solutions of Eq. (33), we give the following heuristic mask distribution

$$P(m_{t,i} = 1 \mid \mathbf{w}_{t-1}, \mathbf{g}_t) = \begin{cases} \beta_t & (\operatorname{abs}(\tilde{g}_{t,i}) > \gamma_t \sigma_{g_t}) \\ \alpha_t & (0 < \operatorname{abs}(\tilde{g}_{t,i}) \leq \gamma_t \sigma_{g_t}) \\ 0 & (\operatorname{abs}(\tilde{g}_{t,i}) = 0) \end{cases}. \quad (37)$$

If  $\beta_t = \delta_t$ ,  $\alpha_t = 0$ ,  $\gamma_t = 0$ , the definition in Eq. (37) is equivalent to that of the random hypermask (Eq. (18)).
